Development 139, 4491 (2012) doi:10.1242/dev.090472  
 © 2012. Published by The Company of Biologists Ltd

## Evolutionary crossroads in developmental biology: Cnidaria

Ulrich Technau and Robert E. Steele

There was an error published in *Development* 138, 1447-1458.

In Fig. 1, the phylogeny depicted among the Medusozoa was incorrect. The corrected Fig. 1 appears below.

The authors apologise to readers for this mistake.

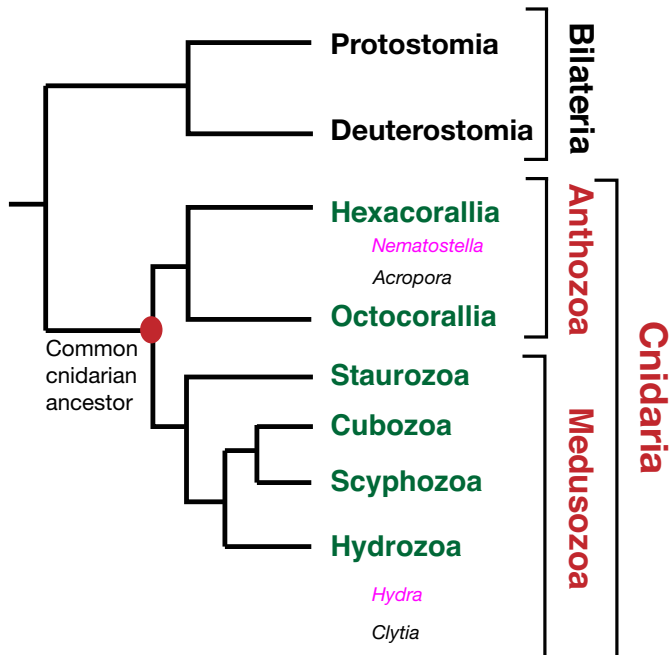

Source: https://cob.silverchair.com/dev/article-pdf/139/23/4491/1575896/4491.pdf
